# Supplementary material for: Effect of Sex on Clinical Outcomes in Patients with Coronavirus Disease: A Population-Based Study
Source: PubMed Central journal article supplement (PMC7794723; doi:10.3390/jcm10010038), 2020-12-24
Supplement: jcm-10-00038-s001.pdf [file jcm-10-00038-s001.pdf]

### **Supplementary Materials**

**Table S1.** Abbreviations in the study.

**Figure S1.** Kaplan-Meier survival curves for populations aged 50–64 (A) or ≥65 (B) years.

**Figure S2.** Forest plot of the association between sex and mortality in patients according to the subgroups.

**Table S2.** Clinical outcomes according to sex for the different age groups.

**Figure S3.** Forest plot of the association between sex and clinical outcomes in patients according to age (A), DM (B), or HTN (C).

**Figure S4.** (A) Proportions of patients with diabetes mellitus or hypertension according to sex and age. (B) CCI scores according to sex and age.

**Table 1.** Abbreviations in the study.

|             |                                                                     |
|-------------|---------------------------------------------------------------------|
| ACE-2:      | angiotensin-converting enzyme-2                                     |
| AHF:        | acute heart failure                                                 |
| AKI:        | acute kidney injury                                                 |
| CCI:        | Charlson comorbidity index                                          |
| COVID-19:   | Coronavirus disease                                                 |
| DM:         | diabetes mellitus                                                   |
| ECMO:       | extracorporeal membrane oxygenation                                 |
| HFNC:       | high flow nasal cannula                                             |
| HIRA:       | Health Insurance Review and Assessment Service                      |
| ICD-10:     | International Classification of Diseases, 10 <sup>th</sup> revision |
| MI:         | myocardial infarction                                               |
| MV:         | mechanical ventilation                                              |
| SARS-CoV-2: | severe acute respiratory syndrome coronavirus 2                     |
| TMPRSS2:    | transmembrane serine protease-2                                     |

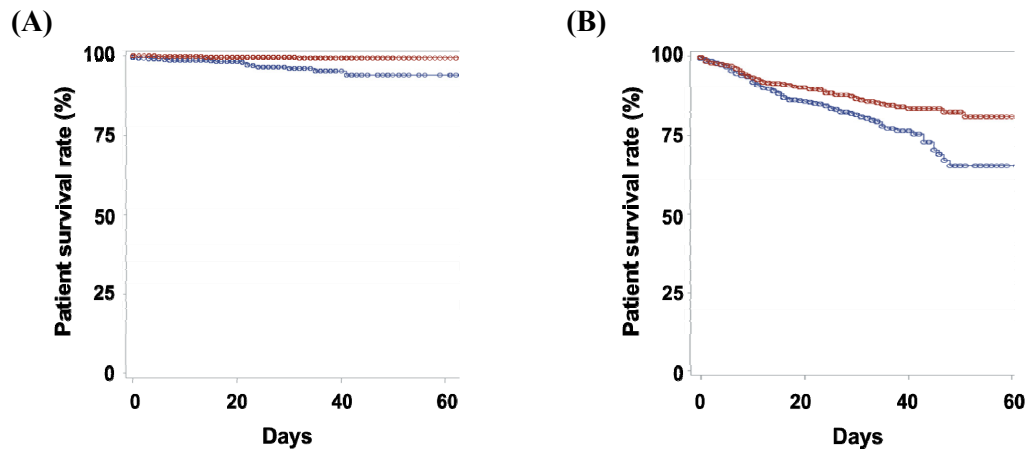

**Figure S1.** Kaplan-Meier survival curves for populations aged 50–64 (A) or  $\geq 65$  (B) years. The blue and red lines show the survival graphs for men and women, respectively. The circle presents the censored point. (A) The 20-day survival rates were 98.3% and 99.7% for men and women, respectively. The 40-day survival rates were 95.5% and 99.7% for men and women, respectively. (B) The 20-day survival rates were 85.6% and 90.1% for men and women, respectively. The 40-day survival rates were 76.3% and 83.2% for men and women, respectively.

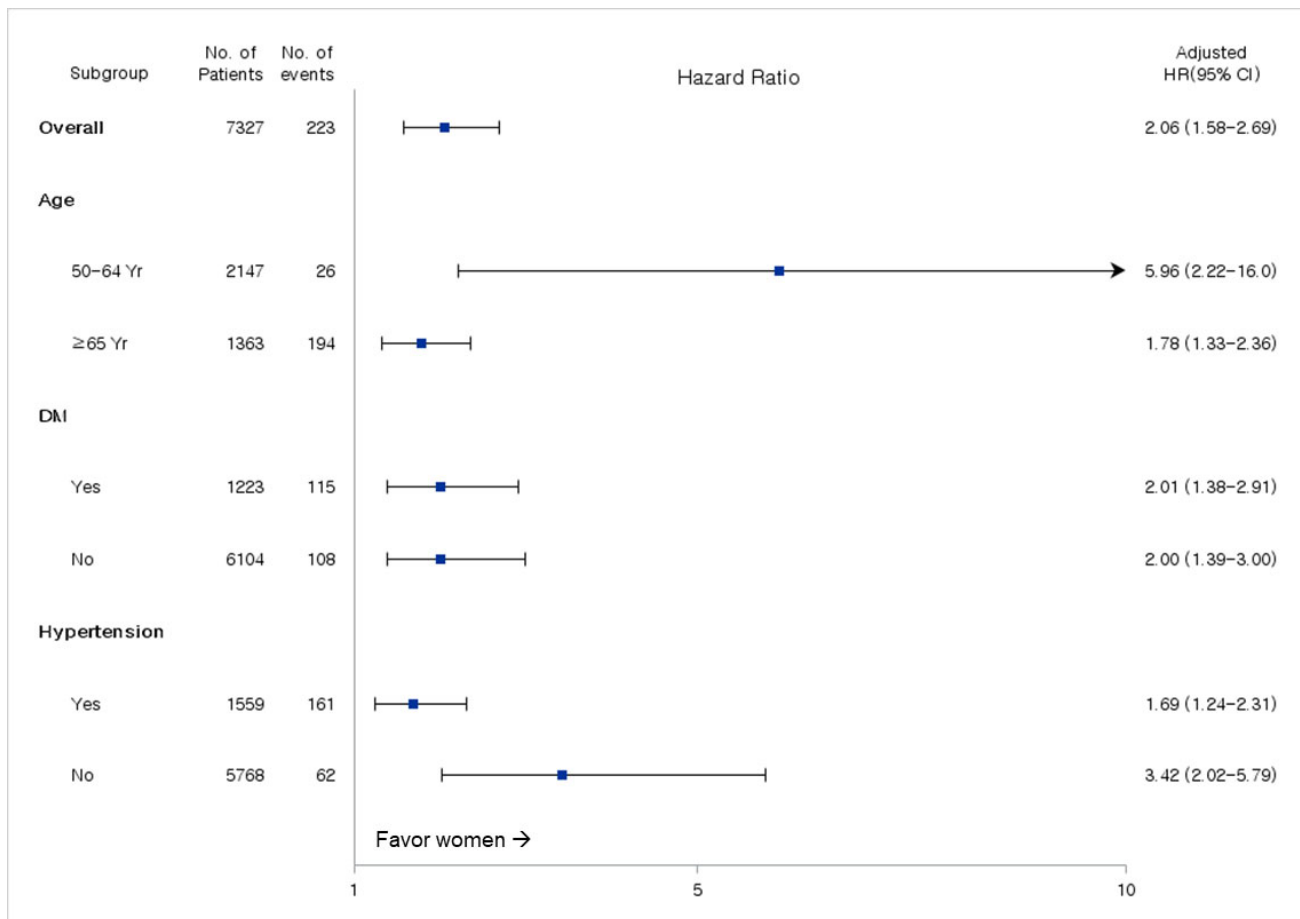

**Figure S2.** Forest plot of the association between sex and mortality in patients according to the subgroups. Multivariate analysis was adjusted for age, sex, CCI score, and hypertension. Multivariate analyses for hypertension subgroups were adjusted for age, sex, and CCI score. Abbreviations: DM, diabetes mellitus; HR, hazard ratio; CI, confidence interval; CCI, Charlson comorbidity index.

**Table S2.** Clinical outcomes according to sex for the different age groups.

|                                     | <b>Total</b> | <b>Men</b> | <b>Women</b> | <b>P-value</b> |
|-------------------------------------|--------------|------------|--------------|----------------|
| <b>&lt; 35 aged</b>                 |              |            |              |                |
| Acute kidney injury                 | 0            | 0          | 0            | -              |
| Inotropics                          | 1 (0.04%)    | 1 (0.1%)   | 0            | 0.469          |
| Conventional oxygen therapy         | 31 (1.3%)    | 19 (1.7%)  | 12 (0.9%)    | 0.106          |
| High flow nasal cannula             | 1 (0.04%)    | 0          | 1 (0.1%)     | 1.000          |
| Mechanical ventilation              | 0            | 0          | 0            | -              |
| Extracorporeal membrane oxygenation | 0            | 0          | 0            | -              |
| Cardiac arrest                      | 0            | 0          | 0            | -              |
| Myocardial infarction               | 81 (3.4%)    | 37 (3.3%)  | 44 (3.4%)    | 0.821          |
| Acute heart failure                 | 46 (1.9%)    | 24 (2.1%)  | 22 (1.7%)    | 0.471          |
| <b>35-49 aged</b>                   |              |            |              |                |
| Acute kidney injury                 | 3 (0.2%)     | 3 (0.6%)   | 0            | 0.041          |
| Inotropics                          | 6 (0.4%)     | 5 (1.0%)   | 1 (0.1%)     | 0.021          |
| Conventional oxygen therapy         | 67 (4.8%)    | 40 (8.2%)  | 27 (2.9%)    | <0.001         |
| High flow nasal cannula             | 7 (0.5%)     | 5 (1.0%)   | 2 (0.2%)     | 0.053          |
| Mechanical ventilation              | 4 (0.3%)     | 4 (0.8%)   | 0            | 0.014          |
| Extracorporeal membrane oxygenation | 1 (0.1%)     | 1 (0.2%)   | 0            | 0.347          |
| Cardiac arrest                      | 1 (0.2%)     | 1 (0.2%)   | 0            | 0.347          |
| Myocardial infarction               | 31 (2.2%)    | 14 (2.9%)  | 17 (1.9%)    | 0.252          |
| Acute heart failure                 | 64 (4.6%)    | 17 (3.5%)  | 47 (5.1%)    | 0.163          |

| <b>50-64 aged</b>                   |             |             |             |        |
|-------------------------------------|-------------|-------------|-------------|--------|
| Acute kidney injury                 | 6 (0.3%)    | 5 (0.6%)    | 1 (0.1%)    | 0.028  |
| Inotropics                          | 49 (2.3%)   | 32 (4.0%)   | 17 (1.3%)   | <0.001 |
| Conventional oxygen therapy         | 281 (13.1%) | 139 (17.5%) | 142 (10.5%) | <0.001 |
| High flow nasal cannula             | 44 (2.0%)   | 29 (3.7%)   | 15 (1.1%)   | <0.001 |
| Mechanical ventilation              | 37 (1.7%)   | 24 (3.0%)   | 13 (1.0%)   | <0.001 |
| Extracorporeal membrane oxygenation | 11 (0.5%)   | 7 (0.9%)    | 4 (0.3%)    | 0.112  |
| Cardiac arrest                      | 10 (0.5%)   | 8 (1.0%)    | 2 (0.1%)    | 0.007  |
| Myocardial infarction               | 78 (3.6%)   | 36 (4.5%)   | 42 (3.1%)   | 0.086  |
| Acute heart failure                 | 109 (5.1%)  | 51 (6.4%)   | 58 (4.3%)   | 0.029  |
| <b>≥65 aged</b>                     |             |             |             |        |
| Acute kidney injury                 | 18 (1.3%)   | 9 (1.6%)    | 9 (1.1%)    | 0.408  |
| Inotropics                          | 126 (9.2%)  | 62 (11.2%)  | 64 (7.9%)   | 0.037  |
| Conventional oxygen therapy         | 522 (38.3%) | 231 (41.8%) | 291 (28.2%) | 0.026  |
| High flow nasal cannula             | 126 (9.2%)  | 67 (12.1%)  | 59 (7.3%)   | 0.002  |
| Mechanical ventilation              | 81 (5.9%)   | 43 (7.8%)   | 39 (4.8%)   | 0.023  |
| Extracorporeal membrane oxygenation | 8 (0.6%)    | 3 (0.5%)    | 5 (0.6%)    | 1.000  |
| Cardiac arrest                      | 31 (2.3%)   | 20 (3.6%)   | 11 (1.4%)   | 0.006  |
| Myocardial infarction               | 66 (4.8%)   | 35 (6.3%)   | 31 (3.8%)   | 0.034  |

|                     |             |            |            |       |
|---------------------|-------------|------------|------------|-------|
| Acute heart failure | 161 (11.8%) | 65 (11.8%) | 96 (11.8%) | 0.972 |
|---------------------|-------------|------------|------------|-------|

---

The data are expressed as number (percentage).

(A)

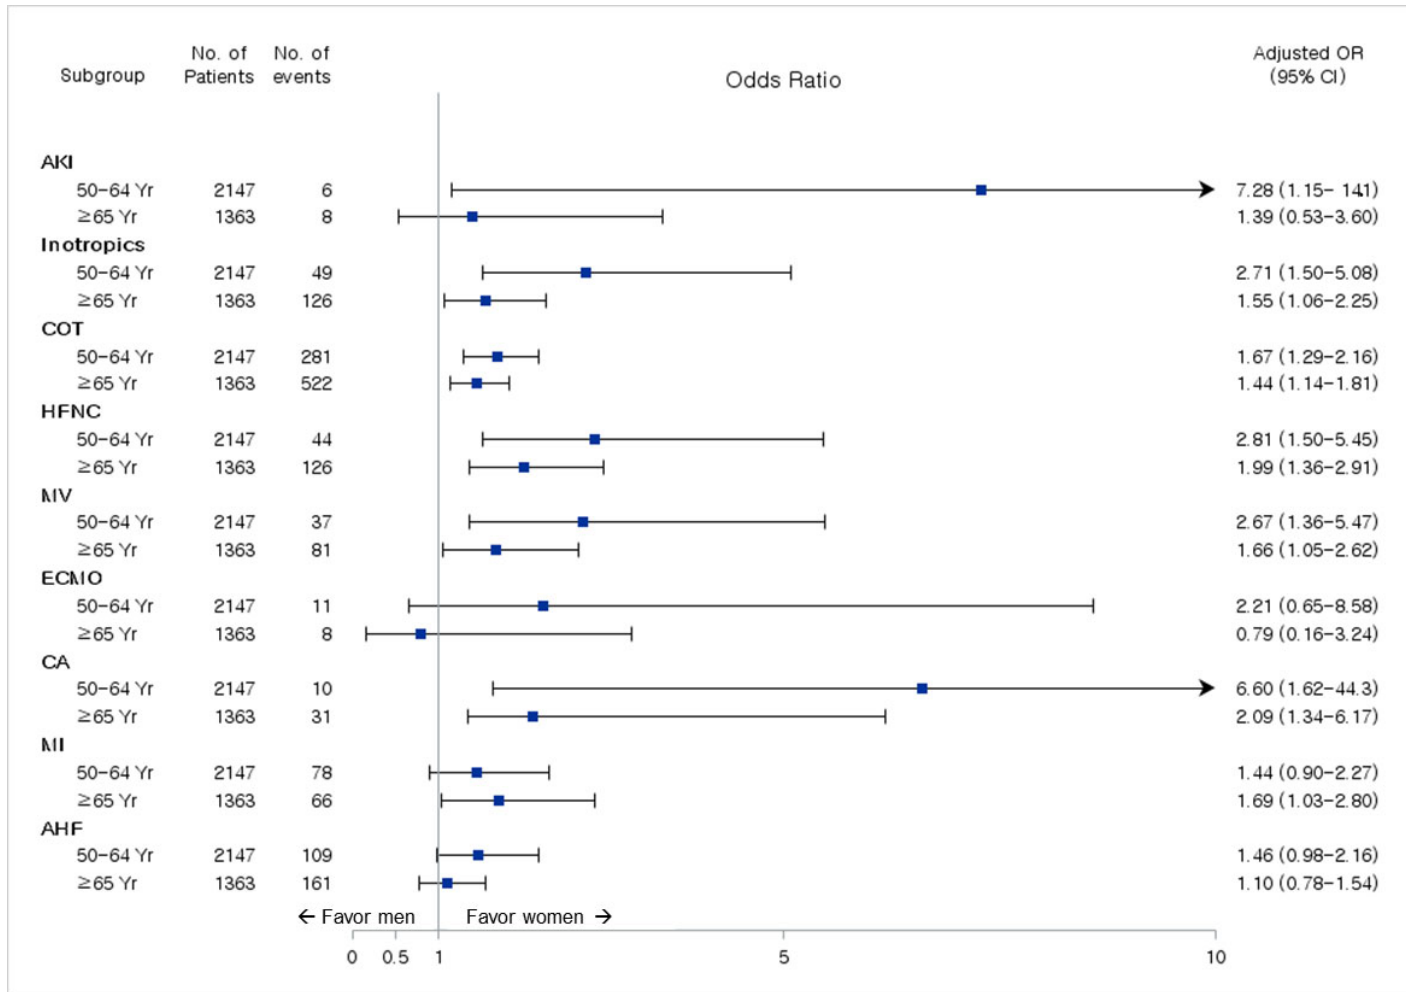



(B)

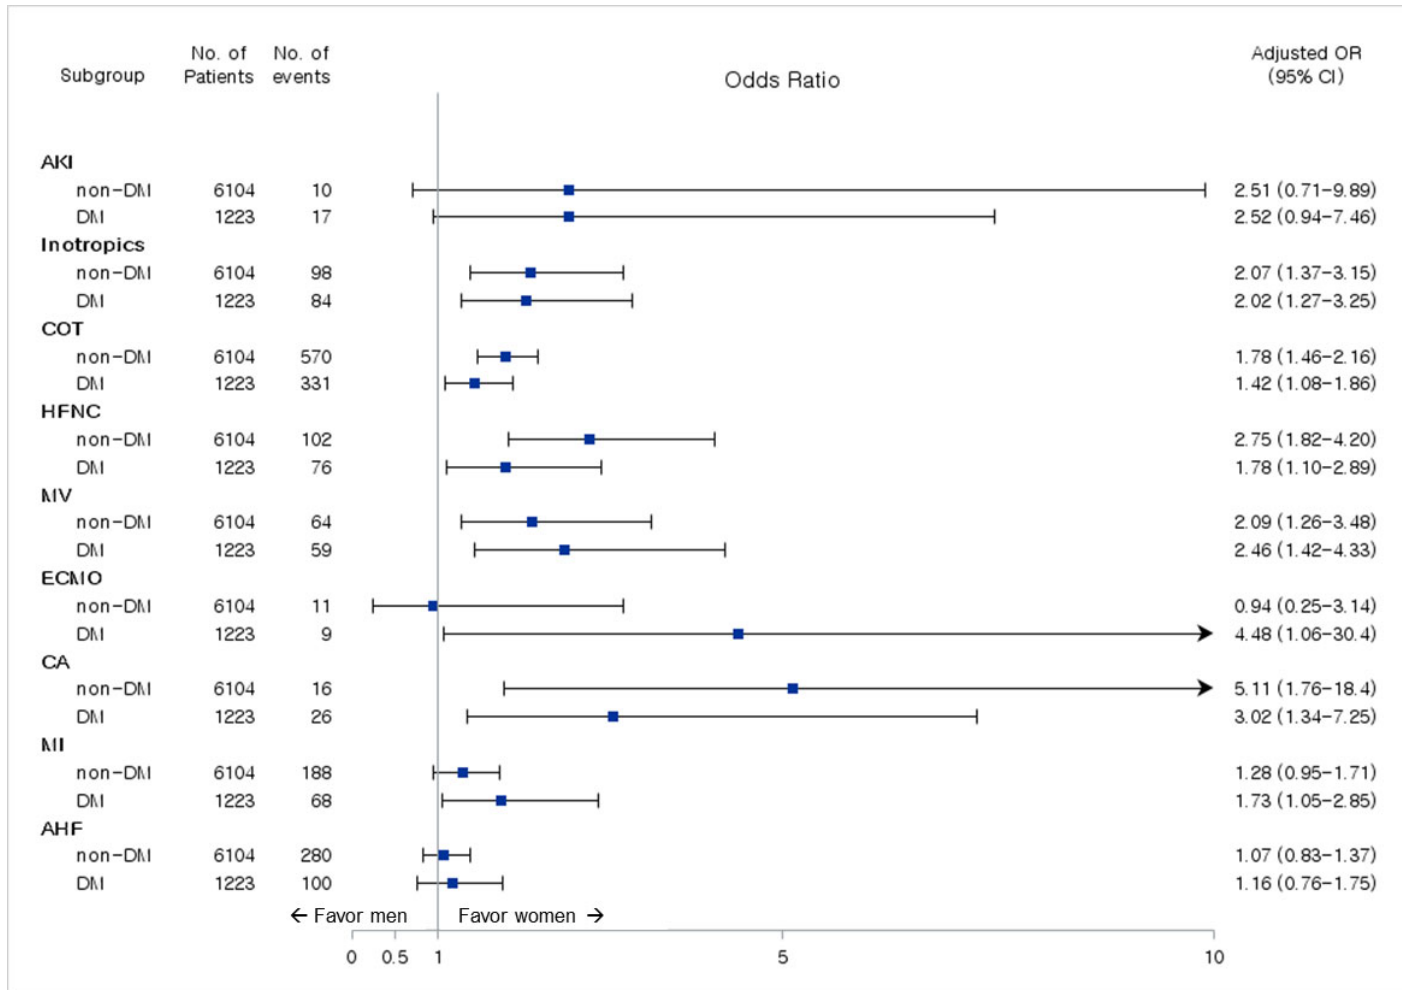

(C)

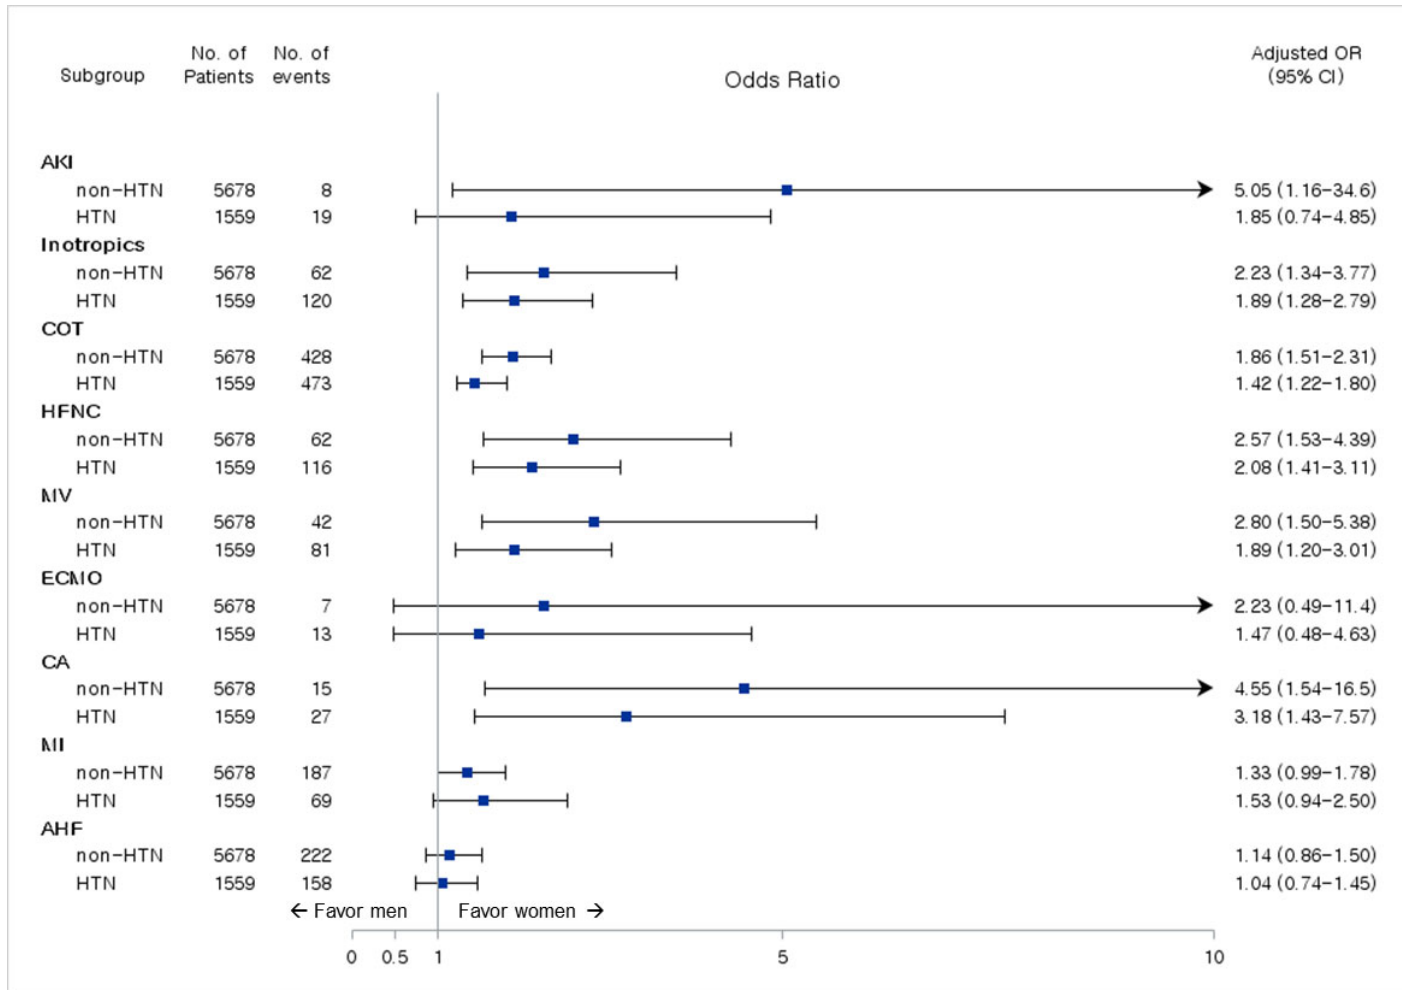

**Figure S3.** Forest plot of the association between sex and clinical outcomes in patients according to age (A), DM (B), or HTN (C). Multivariate analyses for the age or DM subgroups were adjusted for age, sex, CCI score, and HTN. Multivariate analyses for the HTN subgroups were adjusted for age, sex, and CCI score.

Abbreviations: OR, odds ratio; CI, confidence interval; DM, diabetes mellitus; HTN, hypertension; AKI, acute kidney injury; COT, conventional oxygen therapy; HFNC, high flow nasal cannula; MV, mechanical ventilation; ECMO, extracorporeal membrane oxygenation; CA, cardiac arrest; MI, myocardial infarction; AHF, acute heart failure; CCI, Charlson comorbidity index

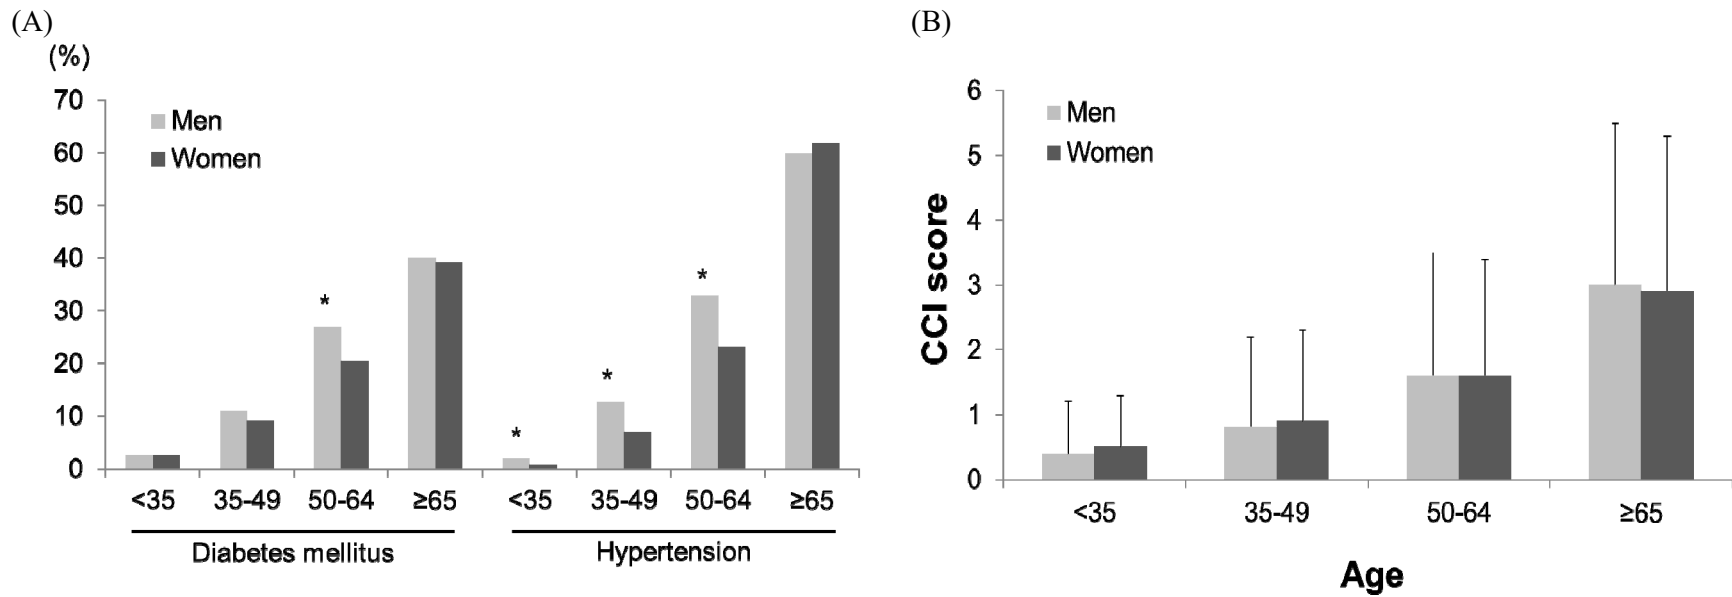

**Figure S4.** (A) Proportions of patients with diabetes mellitus or hypertension according to sex and age. (B) CCI scores according to sex and age. There were 29 (2.6%) and 32 (2.5%) patients with diabetes mellitus among men and women aged <35 years, 53 (10.9%) and 83 (9.1%) patients among men and women aged 35–49 years, 213 (26.9%) and 276 (20.4%) patients among men and women aged 50–64 years, and 220 (39.9%) and 317 (39.1%) patients among men and women aged ≥65 years, respectively. There were 22 (1.9%) and 9 (0.7%) patients with hypertension among men and women aged <35 years, 61 (12.6%) and 63 (6.9%) patients among men and women aged 35–49 years, 260 (32.8%) and 313 (23.1%) patients among men and women aged 50–64 years, and 330 (59.8%) and 501 (61.8%) patients among men and women aged ≥65 years, respectively. \* $P < 0.05$  vs. women in same age group.

Abbreviations: CCI, Charlson comorbidity index
